# Supplementary material for: Longitudinal Associations Between Parenting and Child Behaviour Problems and the Moderating Effect of Child Callous Unemotional Traits in Foster and Biological Families
Source: Springer Nature journal article supplement (doi:10.1007/s10578-022-01324-9), 2022-03-03
Supplement: MOESM1 [file 20191142]

**Supplementary Table 1.** Longitudinal Stabilities for Central Variables.

| Bivariate Correlation            | CFC (N=86) | CBF (N=148) | Fisher's z        |
|----------------------------------|------------|-------------|-------------------|
| Warmth / Support T1 to T2        | .37**      | .58**       | $F=-2.00, p=.023$ |
| Warmth / Support T1 to T3        | .35**      | .54**       | $F=-1.73, p=.041$ |
| Warmth / Support T2 to T3        | .59**      | .63**       | $F=-.46, p=.322$  |
| Psychological Pressure, T1 to T2 | .52**      | .66**       | $F=-1.57, p=.058$ |
| Psychological Pressure, T1 to T3 | .48**      | .42**       | $F=.55, p=.292$   |
| Psychological Pressure, T2 to T3 | .70**      | .61**       | $F=1.15, p=.125$  |
| Externalizing Problems, T1 to T2 | .83**      | .65**       | $F=3.00, p=.001$  |
| Externalizing Problems, T1 to T3 | .77**      | .60**       | $F=2.38, p=.009$  |
| Externalizing Problems, T2 to T3 | .84**      | .77**       | $F=1.46, p=.072$  |
| Internalizing Problems, T1 to T2 | .70**      | .46**       | $F=2.69, p=.004$  |
| Internalizing Problems, T1 to T3 | .73**      | .44**       | $F=3.32, p<.001$  |
| Internalizing Problems, T2 to T3 | .72**      | .53**       | $F=2.31, p=.011$  |

**Supplementary Table 2.** Intercorrelations between study variables for foster families.

|                     | Ext. Prob.,<br>T1 | Int. Prob.,<br>T1 | Ext. Prob.,<br>T2 | Int. Prob.,<br>T2 | Ext. Prob.,<br>T3 | Int. Prob.,<br>T3 | Warmth/<br>supp.,<br>T1 | Psych.<br>Pressure,<br>T1 | Warmth/<br>supp.,<br>T2 | Psych.<br>Pressure,<br>T2 | Warmth/<br>supp.,<br>T3 | Psych.<br>Pressure,<br>T3 |
|---------------------|-------------------|-------------------|-------------------|-------------------|-------------------|-------------------|-------------------------|---------------------------|-------------------------|---------------------------|-------------------------|---------------------------|
| Ext. Problems, T1   |                   |                   |                   |                   |                   |                   |                         |                           |                         |                           |                         |                           |
| Int. Problems, T1   | .62**             |                   |                   |                   |                   |                   |                         |                           |                         |                           |                         |                           |
| Ext. Problems, T2   | .83**             | .56**             |                   |                   |                   |                   |                         |                           |                         |                           |                         |                           |
| Int. Problems, T2   | .51**             | .70**             | .64**             |                   |                   |                   |                         |                           |                         |                           |                         |                           |
| Ext. Problems, T3   | .77**             | .50**             | .84**             | .53**             |                   |                   |                         |                           |                         |                           |                         |                           |
| Int. Problems, T3   | .43**             | .73**             | .49**             | .72**             | .58**             |                   |                         |                           |                         |                           |                         |                           |
| Warmth/support, T1  | -.22              | -.18              | -.24              | -.07              | -.24              | -.14              |                         |                           |                         |                           |                         |                           |
| Psych. Pressure, T1 | .13               | .05               | .10               | -.04              | .15               | .11               | -.16                    |                           |                         |                           |                         |                           |
| Warmth/support, T2  | -.16              | -.15              | -.14              | -.06              | -.19              | -.20              | .37**                   | .03                       |                         |                           |                         |                           |
| Psych. Pressure, T2 | .10               | -.10              | .11               | -.03              | .15               | .01               | -.08                    | .52**                     | -.14                    |                           |                         |                           |
| Warmth/support, T3  | -.24*             | -.12              | -.28*             | -.08              | -.29*             | -.10              | .35**                   | -.07                      | .59**                   | -.11                      |                         |                           |
| Psych. Pressure, T3 | .11               | .10               | .24               | .13               | .28*              | .24*              | -.13                    | .48**                     | -.20                    | .70**                     | -.36**                  |                           |

*Notes.* Pearson correlations were calculated on the imputed data set. \* $p < .05$ , \*\*  $p < .01$ , \*\*\*  $p < .001$ .

**Supplementary Table 3.** Intercorrelations between study variables for biological families.

|                     | Ext. Prob.,<br>T1 | Int. Prob.,<br>T1 | Ext. Prob.,<br>T2 | Int. Prob.,<br>T2 | Ext. Prob.,<br>T3 | Int. Prob.,<br>T3 | Warmth/<br>supp.,<br>T1 | Psych.<br>Pressure,<br>T1 | Warmth/<br>supp.,<br>T2 | Psych.<br>Pressure,<br>T2 | Warmth/<br>supp.,<br>T3 | Psych.<br>Pressure,<br>T3 |
|---------------------|-------------------|-------------------|-------------------|-------------------|-------------------|-------------------|-------------------------|---------------------------|-------------------------|---------------------------|-------------------------|---------------------------|
| Ext. Problems, T1   |                   |                   |                   |                   |                   |                   |                         |                           |                         |                           |                         |                           |
| Int. Problems, T1   | .66**             |                   |                   |                   |                   |                   |                         |                           |                         |                           |                         |                           |
| Ext. Problems, T2   | .65**             | .37**             |                   |                   |                   |                   |                         |                           |                         |                           |                         |                           |
| Int. Problems, T2   | .34**             | .46**             | .56**             |                   |                   |                   |                         |                           |                         |                           |                         |                           |
| Ext. Problems, T3   | .60**             | .24**             | .77**             | .35**             |                   |                   |                         |                           |                         |                           |                         |                           |
| Int. Problems, T3   | .38**             | .44**             | .46**             | .53**             | .55**             |                   |                         |                           |                         |                           |                         |                           |
| Warmth/support, T1  | -.13              | -.21*             | -.13              | -.15              | -.09              | -.14              |                         |                           |                         |                           |                         |                           |
| Psych. Pressure, T1 | .33**             | .30**             | .32**             | .30**             | .24**             | .22*              | -.44**                  |                           |                         |                           |                         |                           |
| Warmth/support, T2  | -.26**            | -.22*             | -.27**            | -.22*             | -.26**            | -.23**            | .58**                   | -.35**                    |                         |                           |                         |                           |
| Psych. Pressure, T2 | .24**             | .21*              | .30**             | .25**             | .20*              | .06               | -.28**                  | .66**                     | -.28**                  |                           |                         |                           |
| Warmth/support, T3  | -.09              | -.10              | -.10              | -.02              | -.14              | -.13              | .54**                   | -.17*                     | .63**                   | -.15                      |                         |                           |
| Psych. Pressure, T3 | .13               | .08               | .26**             | .20*              | .22*              | .09               | -.22*                   | .42**                     | -.29**                  | .61**                     | -.18*                   |                           |

*Notes.* Pearson correlations were calculated on the imputed data set. \* $p < .05$ , \*\*  $p < .01$ , \*\*\*  $p < .001$ .

**Supplementary Table 4.** Multiple Regression Coefficients on Children's Externalizing Problems.

|                                 | Warmth &<br>Support ( <i>SE</i> ) | Psychological<br>Pressure ( <i>SE</i> ) |
|---------------------------------|-----------------------------------|-----------------------------------------|
| Intercept                       | -.11 (.06)                        | -.13 (.06)*                             |
| Group                           | .27 (.11)*                        | .34 (.11)**                             |
| Parenting Behavior              | -.14 (.06)*                       | .20 (.06)**                             |
| CU Traits                       | .28 (.05)***                      | .28 (.06)***                            |
| Parenting<br>Behavior*CU Traits | -.13 (.06)*                       | .06 (.06)                               |

*Notes.* Group: 0 = CBF, 1 = CFC. \* $p < .05$ , \*\*  $p < .01$ , \*\*\*  $p < .001$ . *SE* = Standard Error.

**Supplementary Table 5.** Multiple Regression Coefficients on Children's Internalizing Problems.

|                                 | Warmth &<br>Support ( <i>SE</i> ) | Psychological<br>Pressure ( <i>SE</i> ) |
|---------------------------------|-----------------------------------|-----------------------------------------|
| Intercept                       | -.09 (.06)                        | -.09 (.07)                              |
| Group                           | .25 (.11)*                        | .30 (.11)**                             |
| Parenting Behavior              | -.17 (.06)**                      | .17 (.06)**                             |
| CU Traits                       | .12 (.06)*                        | .11 (.06)*                              |
| Parenting<br>Behavior*CU Traits | -.04 (.06)                        | -.06 (.06)                              |

*Note.* Group: 0 = CBF, 1 = CFC. \* $p < .05$ , \*\*  $p < .01$ , \*\*\*  $p < .001$ . *SE* = Standard Error.
